# Supplementary material for: Direct photocatalytic hydrogen evolution from water splitting using nanostructures of hydrate organic small molecule as photocatalysts
Source: Royal Society of Chemistry journal article supplement (doi:10.1039/c6ta01582d), 2016-01-01
Supplement: c6ta01582d1.pdf [file c6ta01582d1.pdf]

## Electronic Supporting Information

# Direct Photocatalytic Hydrogen Evolution from Water Splitting Using Nanostructures of Hydrate Organic Small Molecule as Photocatalysts

Huihui Li,<sup>ab</sup> Liulun Jie,<sup>ab</sup> Jiannan Pan,<sup>ab</sup> Longtian Kang\*<sup>ab</sup> and Jiannian Yao \*<sup>c</sup>

<sup>a</sup> Laboratory of design and assembly of functional nanostructures, Chinese Academy of Sciences, Fuzhou, 350002 (P.R. China). E-mail: longtiank@fjirsm.ac.cn.

<sup>b</sup> Fujian Provincial Key Laboratory of Nanomaterials, Fujian Institute of Research on the Structure of Matter, Chinese Academy of Sciences, Fuzhou, Fujian 350002, 350002 (P.R. China).

<sup>c</sup> Beijing National Laboratory for Molecular Sciences (BNLMS), Institute of Chemistry, Chinese Academy of Sciences, Beijing 100190, P. R. China.

\*E-mail: jnyao@iccas.ac.cn.

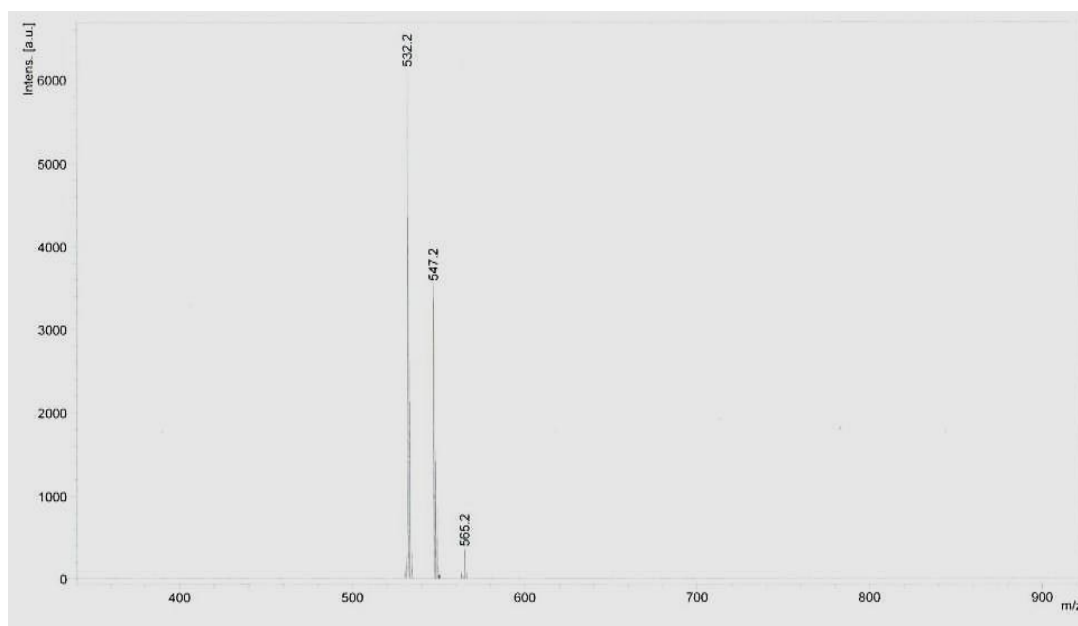

**Fig. S1** MALDI-TOF Mass spectra of rubrene nanoparticles. Calculation for  $C_{42}H_{28}$  ( $M^+$ ),  $m/z$ , 531.7 ; found, 532.2. The peaks at 547.2 should be  $C_{42}H_{27}O$  , which results from the oxidation of rubrene in air.<sup>1</sup>

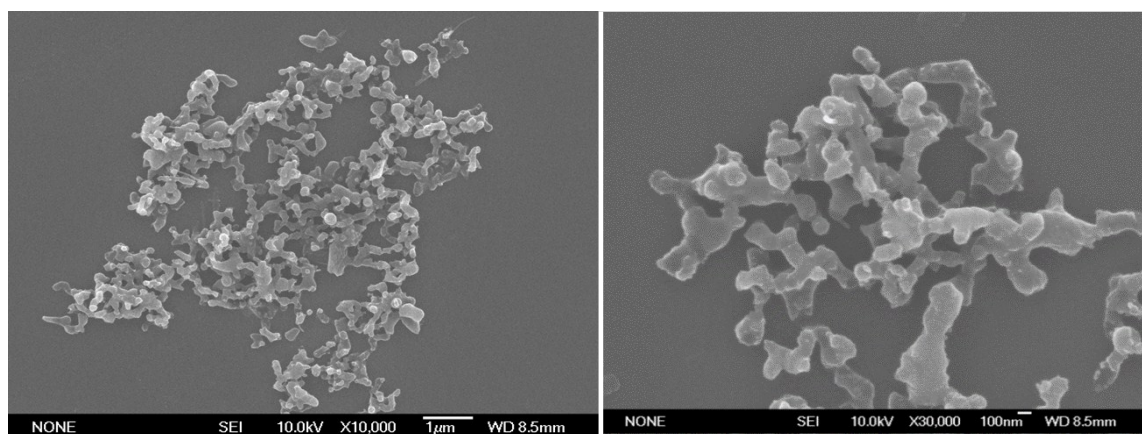

**Fig. S2** SEM images of rubrene nanoparticles with the average size of  $\sim 200$  nm obtained after 1 mL of 1 mM rubrene perchlorate was rapidly injected into 3 mL of ultrapure water.

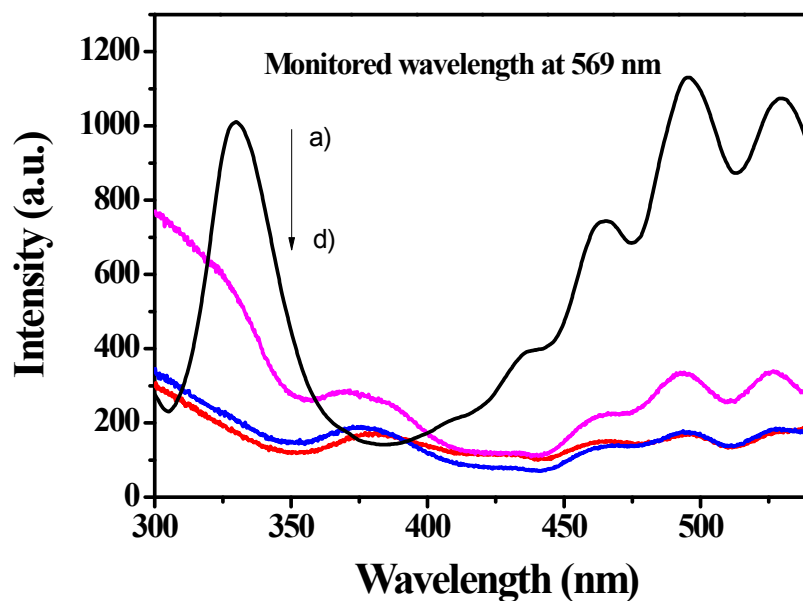

**Fig. S3** The excitation spectra in aqueous dispersion system monitored at 569 nm. a) rubrene nanoparticles and the nanostructure of Rubrene/ZnP-NS with different molar ratio of b) 2:3, c) 1:3 and d) 1:6.

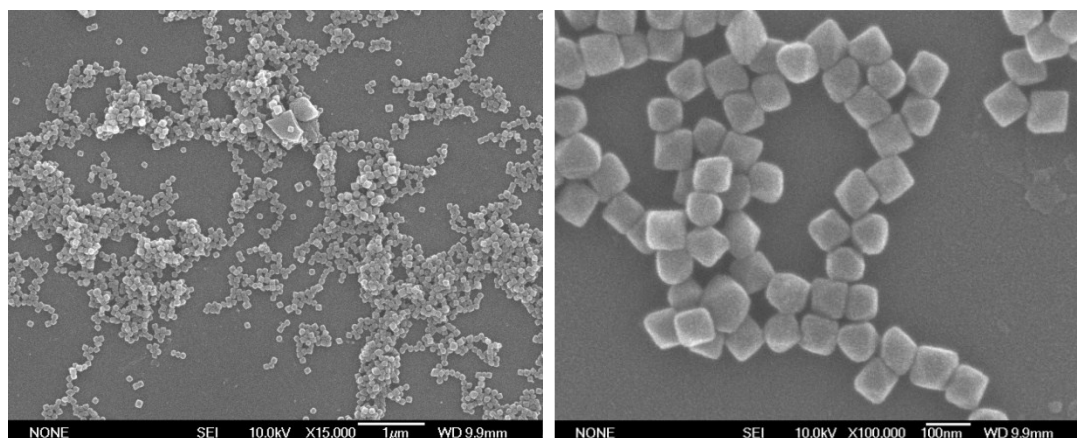

**Fig. S4** SEM images of ZnP octahedron nanoparticles (ZnP-NPs) with the average size of ~80 nm obtained after 1 mL of 1 mM ZnP perchlorate was rapidly injected into 3 mL of ultrapure water including 6 mM CTAB and aged for one hour.

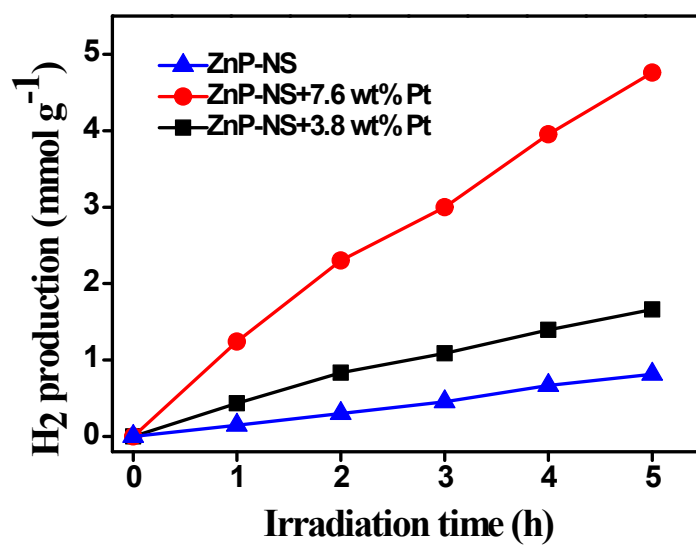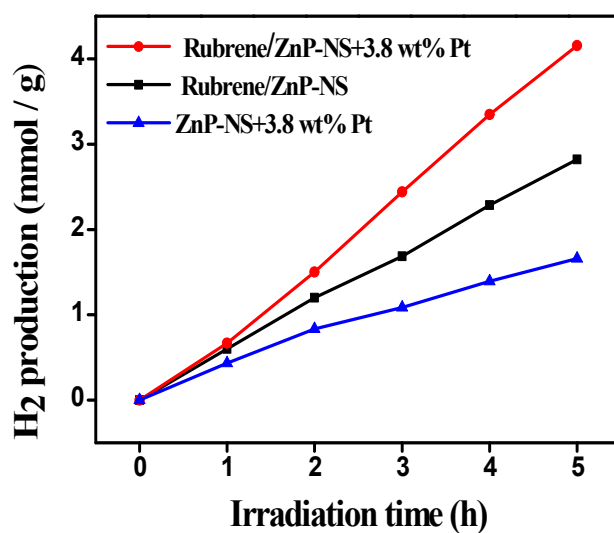

**Fig. S5** Time course of photocatalytic hydrogen evolution of ZnP-NS and Rubrene/ZnP-NS (1:3) nanostructure with and without Platinum (Pt).

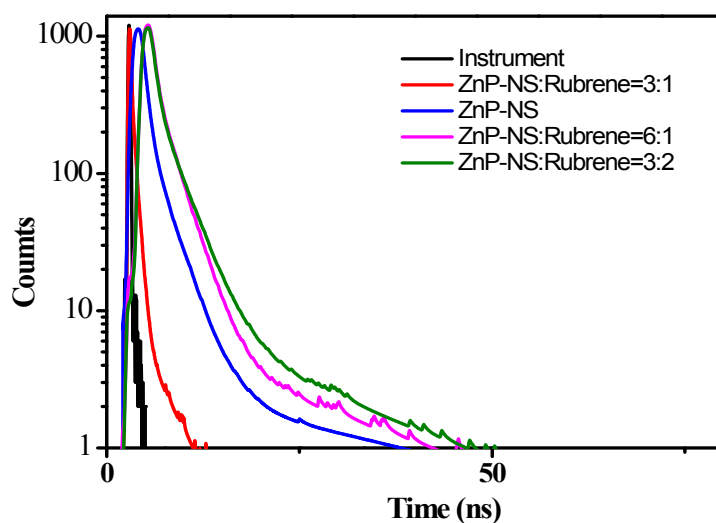

**Fig. S6** Fluorescence decay profiles of sole ZnP-NS and ZnP-NS in Rubrene /ZnP-NS composite with molar ratio of 2:3, 1:3 and 1:6. The system was monitored at 643 nm upon the excitation wavelength of 350 nm.

**Table S1.** Fluorescence decay times of the fluorescence of sole ZnP-NS and ZnP in Rubrene/ZnP-NS composite with molar of 2:3, 1:3 and 1:6. The system was monitored at 643 nm upon the excitation wavelength of 350 nm.

| Molar ratio of<br>ZnP/rubrene | $\tau_1$ |                | $\tau_2$ |                | $\tau_3$ |                | $\tau^a/\text{ns}$ |
|-------------------------------|----------|----------------|----------|----------------|----------|----------------|--------------------|
|                               | ns       | % <sub>1</sub> | ns       | % <sub>2</sub> | ns       | % <sub>3</sub> |                    |
| 1 : 0                         | 0.61     | 69.4           | 2.52     | 25.2           | 45.83    | 5.3            | 3.49               |
| 6 : 1                         | 0.48     | 44.8           | 2.16     | 51.6           | 20.93    | 3.7            | 2.10               |
| 3 : 1                         | 0.41     | 46.1           | 1.93     | 49.1           | 14.91    | 4.8            | 1.85               |
| 3 : 2                         | 0.59     | 50.2           | 2.67     | 44.2           | 19.43    | 5.1            | 2.47               |

<sup>a</sup> Average fluorescence lifetime,  $\tau^a = (\tau_1\%_1 + \tau_2\%_2 + \tau_3\%_3)/100$

1 C. Kloc, K. J. Tan, M. L. Toh, K. K. Zhang, Y. P. Xu, *Apply. Phys. A-mater.*, 2009, **95**, 219-224.
